# Supplementary material for: Identification of novel non-myelin biomarkers in multiple sclerosis using an improved phage-display approach
Source: PubMed Central journal article supplement (PMC6894809; doi:10.1371/journal.pone.0226162), 2019-12-05
Supplement: pone.0226162.s001.pdf [file pone.0226162.s001.pdf]

**S1 Table. Sequence analysis of randomly chosen clones from HB library.**

| Clone | Identity(blastN)                                                                          | Nt sequence       | Homology | ORF |
|-------|-------------------------------------------------------------------------------------------|-------------------|----------|-----|
| HB1   | Homo sapiens neurofilament 3 (150kDa medium) (NEF3), mRNA                                 | 2315-2676         | 99%      | IF  |
| HB2   | Homo sapiens ribosomal protein SA (RPSA), transcript variant 1, mRNA                      | 107-418           | 99%      | IF  |
| HB3   | Homo sapiens chromosome 5 genomic contig                                                  | 42251786-42251655 | 100%     | IF  |
| HB4   | Homo sapiens cold shock domain containing C2, RNA binding (CSDC2), mRNA                   | 10-62             | 98%      | OF  |
| HB5   | Homo sapiens chromosome 2 genomic contig                                                  | 75938720-75938686 | 100%     | IF  |
| HB6   | Human DNA sequence clone RP11-378J18 on chromosome 1                                      | 4894-4807         | 98%      | IF  |
| HB7   | Homo sapiens brain expressed, X-linked 1 (BEX1), mRNA                                     | 232-489           | 100%     | IF  |
| HB8   | Homo sapiens polymerase (RNA) I polypeptide D, 16kDa (POLR1D), transcript variant 2, mRNA | 101-370           | 100%     | IF  |
| HB9   | Homo sapiens enolase 2 (gamma, neuronal) (ENO2), mRNA                                     | 2010-1859         | 99%      | IF  |
| HB10  | Homo sapiens microtubule-associated protein 1B (MAP1B), transcript variant 2, mRNA        | 1808-2034         | 100%     | IF  |
| HB11  | Fas apoptotic inhibitory molecule 2 (FAIM2)                                               | 3615-3545         | 98%      | IF  |
| HB12  | Vesicle-associated membrane protein 1 (VAMP1)                                             | 2038-1806         | 100%     | IF  |
| HB13  | Transient receptor potential cation channel, subfamily V, member 6                        | 1487-1604         | 100%     | IF  |
| HB14  | GNAS complex locus (GNAS)                                                                 | 173-414           | 100%     | OF  |
| HB15  | Chromatin assembly factor 1 (p150) (CHAF1A)                                               | 1275_1428         | 100%     | IF  |

BlastN analysis of 15 randomly picked clones from the ORF-selected phage display cDNA library from human brain. The portion of each identified nucleotide sequence and the percentage of homology are indicated. The sequences of clones that were also coding for the corresponding peptide (“in frame” clones, IF) are indicated; the “out-of-frame” clones (OF) were non coding sequences.
