# Supplementary material for: Identification of novel non-myelin biomarkers in multiple sclerosis using an improved phage-display approach
Source: PubMed Central journal article supplement (PMC6894809; doi:10.1371/journal.pone.0226162), 2019-12-05
Supplement: pone.0226162.s002.pdf [file pone.0226162.s002.pdf]

**S2 Table. Antigens selected with the anti-human IgG.**

| <b>Identity (blastN)</b>                           |
|----------------------------------------------------|
| <i>HS GRB10 interacting GYF protein 2 (GIGYF2)</i> |
| <i>HS DExH-box helicase 9 (DHX9)</i>               |
| <i>WD repeat domain</i>                            |

List of antigens identified by the selection of phage display cDNA library from human brain with anti-human IgG.
