# Supplementary material for: Identification of novel non-myelin biomarkers in multiple sclerosis using an improved phage-display approach
Source: PubMed Central journal article supplement (PMC6894809; doi:10.1371/journal.pone.0226162), 2019-12-05
Supplement: pone.0226162.s003.pdf [file pone.0226162.s003.pdf]

**S3 Table. Nucleotide sequence alignments of clones selected with CSF pool.**

| Clone                 | Freq. | Identity - blastN                                     | GeneBank No.   | % identity | start | end  |
|-----------------------|-------|-------------------------------------------------------|----------------|------------|-------|------|
| HB_CSFD3              | 3/24  | HS DEAD-box helicase 24 (DDX24)                       | NM_020414.3    | 100        | 392   | 744  |
| HB_CSFD12             | 1/24  | HS DEAD-box helicase 24 (DDX24)                       | NM_020414.3    | 100        | 357   | 744  |
| HB_CSFD8              | 2/24  | HS erythrocyte membrane protein band 4.1 (EPB41)      | NM_001166005.1 | 100        | 273   | 436  |
| HB_CSFD6              | 1/24  | HS pleckstrin homology domain containing B2 (PLEKHB2) | NM_017958.2    | 98         | 535   | 751  |
| HB_CSFE12             | 1/24  | HS ST13, Hsp70 interacting protein (ST13)             | NM_003932.4    | 100        | 554   | 749  |
| HB_CSFB2              | 3/24  | HS adenylate kinase 5 (AK5)                           | NM_174858.2    | 100        | 1897  | 1719 |
| HB_CSFE9              | 3/24  | HS CAP-Gly domain containing linker protein 1 (CLIP1) | NM_002956.2    | 100        | 3341  | 3148 |
| HB_CSFA3              | 1/24  | n.a.                                                  | n.a            |            |       |      |
| HB_CSFD4 <sup>a</sup> | 2/24  | n.a.                                                  | n.a            |            |       |      |
| HB_CSFA2 <sup>b</sup> | 7/24  | HS GRB10 interacting GYF protein 2 (GIGYF2)           | NM_001103147.1 | 99         | 2628  | 2976 |

BlastN analysis of 24 positive clones identified by the selection of phage display cDNA library from human brain with pooled and purified IgG from CSF of MS patients. For each clone are indicated: the code of the clone (“Clone”); the clone frequency (“Freq.”) corresponding to the number of clones, over the total clones sequenced, that map to the same antigen; the nucleotide sequence identified by blastN analysis (“Identity-blastN”); the NCBI accession number (“GeneBank No.”) of the identified sequence; the percentage of homology (“% identity”) with the identified sequence; the first and last nucleotide of the identified sequence.

<sup>a</sup>out of frame clones

<sup>b</sup>background clones shared with the anti-human IgG selection
