# Supplementary material for: Identification of novel non-myelin biomarkers in multiple sclerosis using an improved phage-display approach
Source: PubMed Central journal article supplement (PMC6894809; doi:10.1371/journal.pone.0226162), 2019-12-05
Supplement: pone.0226162.s004.pdf [file pone.0226162.s004.pdf]

**S4 Table. Protein sequence alignments of clones selected with CSF pool.**

| Clone     | Freq. | Identity - blastP                        | ProtBank No.   | % identity | start | end | classification |
|-----------|-------|------------------------------------------|----------------|------------|-------|-----|----------------|
| HB_CSFD3  | 3/24  | DEAD-box helicase 24                     | NP_065147.1    | 100        | 99    | 215 | ORF            |
| HB_CSFD12 | 1/24  | DEAD-box helicase 24                     | NP_065147.1    | 100        | 87    | 215 | ORF            |
| HB_CSFD8  | 2/24  | Erythrocyte membrane protein band 4.1    | NP_001159477.1 | 100        | 50    | 103 | ORF            |
| HB_CSFD6  | 1/24  | Pleckstrin homology domain containing B2 | NP_001296379.1 | 97         | 1     | 29  | ORF            |
| HB_CSFE12 | 1/24  | Hsp70 interacting protein                | NP_003923.2    | 97         | 30    | 95  | ORF            |
| HB_CSFB2  | 3/24  | Flotillin 2                              | NP_004466.2    | 55         | 28    | 38  | mimotope       |
| HB_CSFE9  | 3/24  | n.a                                      |                |            |       |     | unidentified   |
| HB_CSFA3  | 1/24  | n.a                                      |                |            |       |     | unidentified   |
| HB_CSFD4  | 2/24  | n.a                                      |                |            |       |     | out-of-frame   |
| HB_CSFA2  | 7/24  | GRB10-interacting GYF protein 2          | NP_001096618.1 | 97         | 761   | 876 | background     |

BlastP analysis of 24 positive clones identified by the selection of phage display cDNA library from human brain with pooled and purified IgG from CSF of MS patients. For each clone are indicated: the code of the clone ("Clone"); the clone frequency ("Freq.") corresponding to the number of clones, over the total clones sequenced, that map to the same antigen; the aminoacid sequence identified by blastP analysis using the translation of the clone nucleotide sequence ("Identity-blastN"); the NCBI accession number ("ProtBank No.") of the identified sequence; the percentage of homology ("% identity") with the identified sequence; the first and last nucleotide of the identified sequence. The last column reports as the clone can be classified: "ORF" if the clone was in frame and an aminoacid sequence was identified; "mimotope" if the nucleotide and aminoacid sequences identified belong to different gene; "unidentified" if an aminoacid sequence was not identified; "out-of-frame" if the clone was apparently not coding; "background" if the clone was also identified in the selection against only human IgG.
