# Supplementary material for: Identification of novel non-myelin biomarkers in multiple sclerosis using an improved phage-display approach
Source: PubMed Central journal article supplement (PMC6894809; doi:10.1371/journal.pone.0226162), 2019-12-05
Supplement: pone.0226162.s006.pdf [file pone.0226162.s006.pdf]

**S6 Table. Protein sequence alignments of clones selected with sera pool.**

| Clone    | Freq. | Identity - blastP                                | ProtBank No.   | % identity | start | end  | classification |
|----------|-------|--------------------------------------------------|----------------|------------|-------|------|----------------|
| HB_RRG7  | 1/42  | Amyloid beta precursor protein                   | NP_958816.1    | 99         | 299   | 366  | ORF            |
| HB_RRF1  | 1/42  | ATP synthase membrane subunit e                  | NP_009031.1    | 97         | 1     | 35   | ORF            |
| HB_RRB7  | 1/42  | Brain expressed X-linked 2                       | NP_001161871.1 | 99         | 29    | 114  | ORF            |
| HB_RRH5  | 1/42  | DEAD-box helicase 24                             | NP_065147.1    | 100        | 87    | 215  | ORF            |
| HB_RRC8  | 1/42  | DEAD-box helicase 24                             | NP_065147.1    | 99         | 99    | 186  | ORF            |
| HB_RRH11 | 1/42  | Heterogeneous nuclear ribonucleoprotein U like 2 | NP_001073027.1 | 98         | 663   | 717  | ORF            |
| HB_RRH2  | 1/42  | microtubule-associated protein 1B                | NP_005900.2    | 100        | 643   | 753  | ORF            |
| HB_RRB8  | 1/42  | Flotillin 2                                      | NP_004466.2    | 55         | 28    | 38   | mimotope       |
| HB_RRE2  | 1/42  | Uridine-cytidine kinase 1 like 1                 | NP_060329.2    | 50         | 69    | 94   | mimotope       |
| HB_RRC3  | 1/42  | n.a                                              |                |            |       |      | unidentified   |
| HB_RRA12 | 1/42  | n.a                                              |                |            |       |      | unidentified   |
| HB_RRA11 | 1/42  | n.a                                              |                |            |       |      | unidentified   |
| HB_RRC6  | 1/42  | n.a                                              |                |            |       |      | out-of-frame   |
| HB_RRH9  | 6/42  | n.a                                              |                |            |       |      | out-of-frame   |
| HB_RRB10 | 20/42 | GRB10-interacting GYF protein 2                  | NP_001096618.1 | 97         | 761   | 876  | background     |
| HB_RRD12 | 3/42  | ATP-dependent RNA helicase A DHX9                | NP_001348.2    | 100        | 1183  | 1267 | background     |

BlastP analysis of 42 positive clones identified by the selection of phage display cDNA library from human brain with pooled and purified IgG from sera of MS patients. For the meaning of column heading see the legend of S4 Table.
