# Supplementary material for: Identification of novel non-myelin biomarkers in multiple sclerosis using an improved phage-display approach
Source: PubMed Central journal article supplement (PMC6894809; doi:10.1371/journal.pone.0226162), 2019-12-05
Supplement: pone.0226162.s007.pdf [file pone.0226162.s007.pdf]

**S7 Table. Nucleotide sequence alignments of clones selected with the scFV library.**

| Clone                      | Freq. | Identity - blastN                                    | GeneBank No. | % identity | start | end  |
|----------------------------|-------|------------------------------------------------------|--------------|------------|-------|------|
| HB_scFv-CSFA1              | 3/15  | HS DEAD-box helicase 24 (DDX24)                      | NM_020414.3  | 100        | 357   | 744  |
| HB_scFv-CSFB5              | 2/15  | HS DEAD-box helicase 24 (DDX24)                      | NM_020414.3  | 100        | 515   | 786  |
| HB_scFv-CSFA5              | 1/15  | HS DEAD-box helicase 24 (DDX24)                      | NM_020414.3  | 100        | 392   | 744  |
| HB_scFv-CSFB7              | 1/15  | HS transcription elongation factor A like 4 (TCEAL4) | NM_024863.5  | 100        | 591   | 743  |
| HB_scFv-CSFE5              | 1/15  | HS transcription elongation regulator 1 (TCERG1)     | NM_006706.3  | 100        | 2085  | 2418 |
| HB_scFv-CSFB6              | 2/15  | HS adenylate kinase 5 (AK5)                          | NM_174858.2  | 100        | 1897  | 1719 |
| HB_scFv-CSFA8              | 2/15  | HS Fas apoptotic inhibitory molecule 2 (FAIM2)       | NM_012306.3  | 99         | 3655  | 3585 |
| HB_scFv-CSFG6              | 1/15  | HS cathepsin C (CTSC)                                | NM_148170.4  | 93         | 4132  | 4078 |
| HB_scFv-CSFG7              | 1/15  | HS vesicle associated membrane protein 1 (VAMP1)     | NM_014231.4  | 99         | 2402  | 2128 |
| HB_scFv-CSFF4 <sup>a</sup> | 1/15  | HS RNA, 28S ribosomal (LOC109910382), ribosomal RNA  | NR_146154.1  | 100        | 3933  | 3734 |

BlastN analysis of 15 positive clones identified by the selection of phage display cDNA library from human brain with the scFv phage display library from CSF of two RR-MS patients. For the meaning of column heading see the legend of S3 Table.

<sup>a</sup>out of frame clones
