# Supplementary material for: Identification of novel non-myelin biomarkers in multiple sclerosis using an improved phage-display approach
Source: PubMed Central journal article supplement (PMC6894809; doi:10.1371/journal.pone.0226162), 2019-12-05
Supplement: pone.0226162.s008.pdf [file pone.0226162.s008.pdf]

**S8 Table. Protein sequence alignments of clones selected with the scFv library.**

| Clone         | Freq. | Identity - blastP                                      | ProtBank No.   | % identity | start | end | classification |
|---------------|-------|--------------------------------------------------------|----------------|------------|-------|-----|----------------|
| HB_scFv-CSFA1 | 3/15  | DEAD-box helicase 24                                   | NP_065147.1    | 100        | 87    | 215 | ORF            |
| HB_scFv-CSFB5 | 2/15  | DEAD-box helicase 24                                   | NP_065147.1    | 100        | 140   | 229 | ORF            |
| HB_scFv-CSFA5 | 1/15  | DEAD-box helicase 24                                   | NP_065147.1    | 100        | 99    | 215 | ORF            |
| HB_scFv-CSFB7 | 1/15  | Transcription elongation factor A like 4               | NP_001006936.1 | 100        | 98    | 148 | ORF            |
| HB_scFv-CSFE5 | 1/15  | Transcription elongation regulator 1                   | XP_004042807.1 | 99         | 683   | 793 | ORF            |
| HB_scFv-CSFB6 | 2/15  | Flotillin 2                                            | NP_004466.2    | 55         | 28    | 38  | mimotope       |
| HB_scFv-CSFA8 | 2/15  | Phosphatidylinositol-4-phosphate 5-kinase type 1 alpha | XP_006711630.1 | 50         | 450   | 465 | mimotope       |
| HB_scFv-CSFG6 | 1/15  | n.a                                                    |                |            |       |     | unidentified   |
| HB_scFv-CSFG7 | 1/15  | n.a                                                    |                |            |       |     | unidentified   |
| HB_scFv-CSFF4 | 1/15  | n.a                                                    |                |            |       |     | out-of-frame   |

BlastP analysis of 15 positive clones identified by the selection of phage display cDNA library from human brain with the scFv phage display library from CSF of two RR-MS patients. For the meaning of column heading see the legend of S4 Table.
