# Supplementary material for: Identification of novel non-myelin biomarkers in multiple sclerosis using an improved phage-display approach
Source: PubMed Central journal article supplement (PMC6894809; doi:10.1371/journal.pone.0226162), 2019-12-05
Supplement: pone.0226162.s012.pdf [file pone.0226162.s012.pdf]

**MS # PONE-D-19-17789**

**Responses to reviewers**

**Reviewer #1**

- **Line 120** in the revisited manuscript:

"For the selection against CSF samples, were pooled samples of 7 untreated RR MS patients (EDSS 0-3.5) and 4 clinically isolated syndrome (CIS) patients (EDSS 0-2)"

I am pretty confident that the correct English version of such sentence should be:

"Samples from 7 untreated RR MS patients (EDSS 0-3.5) and 4 clinically isolated syndrome (CIS) patients (EDSS 0-2) were pooled for the selection against CSF samples".

***We agree with the reviewer and the sentence has been corrected.***

-**Line 431.** I think it is worth to mention the citation of Owen et al. 2003 to briefly explain the oligoclonal nature of the antibodies obtained from CSF of MS patients.

***The bibliographic reference has been cited and the following sentence has been added.***

***Old Sentence***

An estimated value of 73% was calculated. The scFv library was used to select the HB phage library as described in Methods.

***New sentence***

An estimated value of 73% was calculated. **It should be noted that, since the B cell present in the CSF of MS patients are a very oligoclonal population, the fact that 27% of the clones would share the same VL fragment is expected and in accordance with previously described data [27].** The scFv library was used to select the HB phage library as described in Methods.

***The references of the citations has been revised accordingly.***
